# Supplementary material for: National Trends in Colorectal Cancer Incidence Among Older and Younger Adults in Canada
Source: PubMed Central journal article supplement (PMC6669779; doi:10.1001/jamanetworkopen.2019.8090), 2019-07-31
Supplement: jamanetwopen-2-e198090-s001.pdf [file jamanetwopen-2-e198090-s001.pdf]

## Supplementary Online Content

Brenner DR, Heer E, Sutherland RL, et al. National trends in colorectal cancer incidence among older and younger adults in Canada. *JAMA Netw Open*. 2019;2(7):e198090. doi:10.1001/jamanetworkopen.2019.8090

**eTable.** Number of Incident Colorectal Cancer Cases From 1971 to 2015

**eFigure 1.** Age-Specific Incidence Rates of Colon Cancer Among Women in Canada (1971-2015) by 10-Year Age Groups

**eFigure 2.** Age-Specific Incidence Rates of Colon Cancer Among Men in Canada (1971-2015) by 10-Year Age Groups

**eFigure 3.** Age-Specific Incidence Rates of Rectal Cancer Among Women in Canada (1971-2015) by 10-Year Age Groups

**eFigure 4.** Age-Specific Incidence Rates of Rectal Cancer Among Men in Canada (1971-2015) by 10-Year Age Groups

This supplementary material has been provided by the authors to give readers additional information about their work.

**eTable.** Number of Incident Colorectal Cancer Cases From 1971 to 2015

|      | Colon |        |       | Rectum |        |      | Colorectal |        |       |
|------|-------|--------|-------|--------|--------|------|------------|--------|-------|
| Year | Male  | Female | Both  | Male   | Female | Both | Male       | Female | Both  |
| 1971 | 2240  | 2760   | 5000  | 1550   | 1055   | 2605 | 3760       | 3830   | 7590  |
| 1972 | 2295  | 2870   | 5165  | 1515   | 1085   | 2600 | 3805       | 3955   | 7760  |
| 1973 | 2605  | 3245   | 5850  | 1615   | 1210   | 2825 | 4235       | 4445   | 8680  |
| 1974 | 2585  | 3195   | 5780  | 1545   | 1200   | 2745 | 4145       | 4355   | 8500  |
| 1975 | 2650  | 3195   | 5845  | 1630   | 1235   | 2865 | 4295       | 4420   | 8715  |
| 1976 | 2965  | 3415   | 6380  | 1745   | 1245   | 2990 | 4690       | 4660   | 9350  |
| 1977 | 3100  | 3675   | 6775  | 1835   | 1415   | 3250 | 4935       | 5080   | 10015 |
| 1978 | 3320  | 3965   | 7285  | 1945   | 1480   | 3425 | 5260       | 5440   | 10700 |
| 1979 | 3325  | 3990   | 7315  | 1965   | 1560   | 3525 | 5305       | 5535   | 10840 |
| 1980 | 3325  | 4005   | 7330  | 1910   | 1450   | 3360 | 5245       | 5430   | 10675 |
| 1981 | 3690  | 4165   | 7855  | 2100   | 1555   | 3655 | 5825       | 5730   | 11555 |
| 1982 | 3745  | 4365   | 8110  | 2165   | 1605   | 3770 | 5940       | 5960   | 11900 |
| 1983 | 4000  | 4530   | 8530  | 2220   | 1730   | 3950 | 6220       | 6265   | 12485 |
| 1984 | 4160  | 4600   | 8760  | 2295   | 1675   | 3970 | 6450       | 6260   | 12710 |
| 1985 | 4345  | 4830   | 9175  | 2410   | 1825   | 4235 | 6780       | 6660   | 13440 |
| 1986 | 4365  | 4765   | 9130  | 2390   | 1765   | 4155 | 6775       | 6525   | 13300 |
| 1987 | 4450  | 4915   | 9365  | 2480   | 1740   | 4220 | 6945       | 6665   | 13610 |
| 1988 | 4675  | 4815   | 9490  | 2465   | 1795   | 4260 | 7145       | 6590   | 13735 |
| 1989 | 4625  | 4895   | 9520  | 2555   | 1795   | 4350 | 7185       | 6670   | 13855 |
| 1990 | 4795  | 4995   | 9790  | 2595   | 1875   | 4470 | 7375       | 6875   | 14250 |
| 1991 | 4855  | 5085   | 9940  | 2685   | 1790   | 4475 | 7530       | 6875   | 14405 |
| 1992 | 5125  | 5240   | 10365 | 2850   | 1860   | 4710 | 7950       | 7100   | 15050 |
| 1993 | 4945  | 5340   | 10285 | 2875   | 1940   | 4815 | 7815       | 7285   | 15100 |
| 1994 | 5325  | 5345   | 10670 | 2820   | 1955   | 4775 | 8145       | 7295   | 15440 |
| 1995 | 5210  | 5355   | 10565 | 2910   | 1910   | 4820 | 8115       | 7255   | 15370 |
| 1996 | 5260  | 5325   | 10585 | 2900   | 1905   | 4805 | 8165       | 7240   | 15405 |
| 1997 | 5370  | 5450   | 10820 | 2975   | 1995   | 4970 | 8345       | 7455   | 15800 |
| 1998 | 5715  | 5920   | 11635 | 3135   | 2150   | 5285 | 8850       | 8060   | 16910 |
| 1999 | 5890  | 5920   | 11810 | 3280   | 2115   | 5395 | 9180       | 8035   | 17215 |
| 2000 | 6185  | 6180   | 12365 | 3475   | 2235   | 5710 | 9675       | 8440   | 18115 |
| 2001 | 6110  | 6165   | 12275 | 3680   | 2300   | 5980 | 9805       | 8470   | 18275 |
| 2002 | 6300  | 6205   | 12505 | 3705   | 2390   | 6095 | 10005      | 8580   | 18585 |
| 2003 | 6280  | 6210   | 12490 | 3640   | 2440   | 6080 | 9930       | 8655   | 18585 |
| 2004 | 6490  | 6560   | 13050 | 3930   | 2405   | 6335 | 10440      | 8970   | 19410 |
| 2005 | 6765  | 6615   | 13380 | 3935   | 2485   | 6420 | 10710      | 9095   | 19805 |
| 2006 | 6870  | 6595   | 13465 | 4020   | 2480   | 6500 | 10905      | 9075   | 19980 |

|           |            |            |            |            |       |        |        |        |        |
|-----------|------------|------------|------------|------------|-------|--------|--------|--------|--------|
| 2007      | 7135       | 6780       | 13915      | 4145       | 2600  | 6745   | 11290  | 9400   | 20690  |
| 2008      | 7255       | 6905       | 14160      | 4410       | 2630  | 7040   | 11650  | 9550   | 21200  |
| 2009      | 7345       | 6885       | 14230      | 4410       | 2770  | 7180   | 11750  | 9660   | 21410  |
| 2010      | 7115       | 7040       | 14155      | 4310       | 2700  | 7010   | 11425  | 9725   | 21150  |
| 2011      | 7225       | 6765       | 13990      | 4415       | 2650  | 7065   | 11630  | 9425   | 21055  |
| 2012      | 7205       | 6800       | 14005      | 4465       | 2675  | 7140   | 11715  | 9475   | 21190  |
| 2013      | 7460       | 6750       | 14210      | 4630       | 2690  | 7320   | 12105  | 9450   | 21555  |
| 2014      | 7570       | 6710       | 14280      | 4590       | 2745  | 7335   | 12205  | 9435   | 21640  |
| 2015      | 7640       | 6475       | 14115      | 4580       | 2780  | 7360   | 12245  | 9265   | 21510  |
| 1971-2015 | 22990<br>5 | 23581<br>0 | 46571<br>5 | 13370<br>0 | 88890 | 222590 | 363895 | 324620 | 688515 |

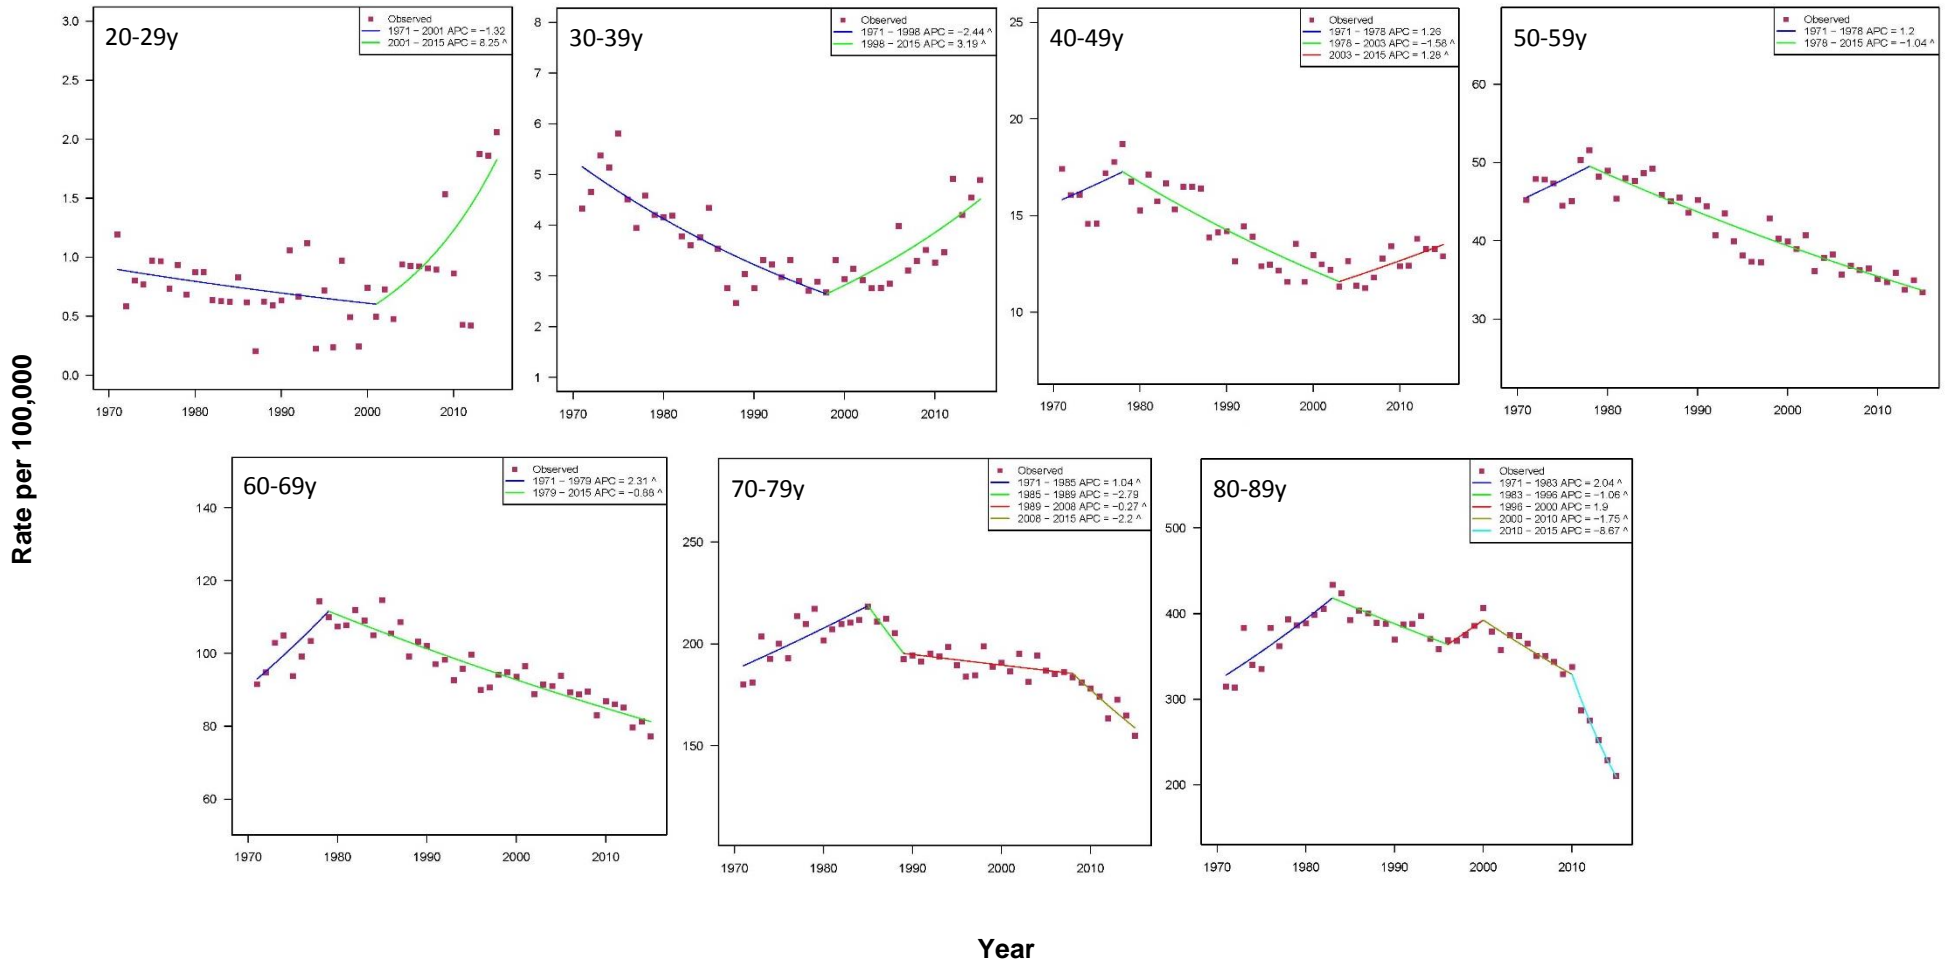

**eFigure 1. Age-Specific Incidence Rates of Colon Cancer Among Women in Canada (1971-2015) by 10-Year Age Groups**

Annual percent changes given in legend.

^ Indicates that the annual percent change is significantly different from zero at the alpha=0.05 level.

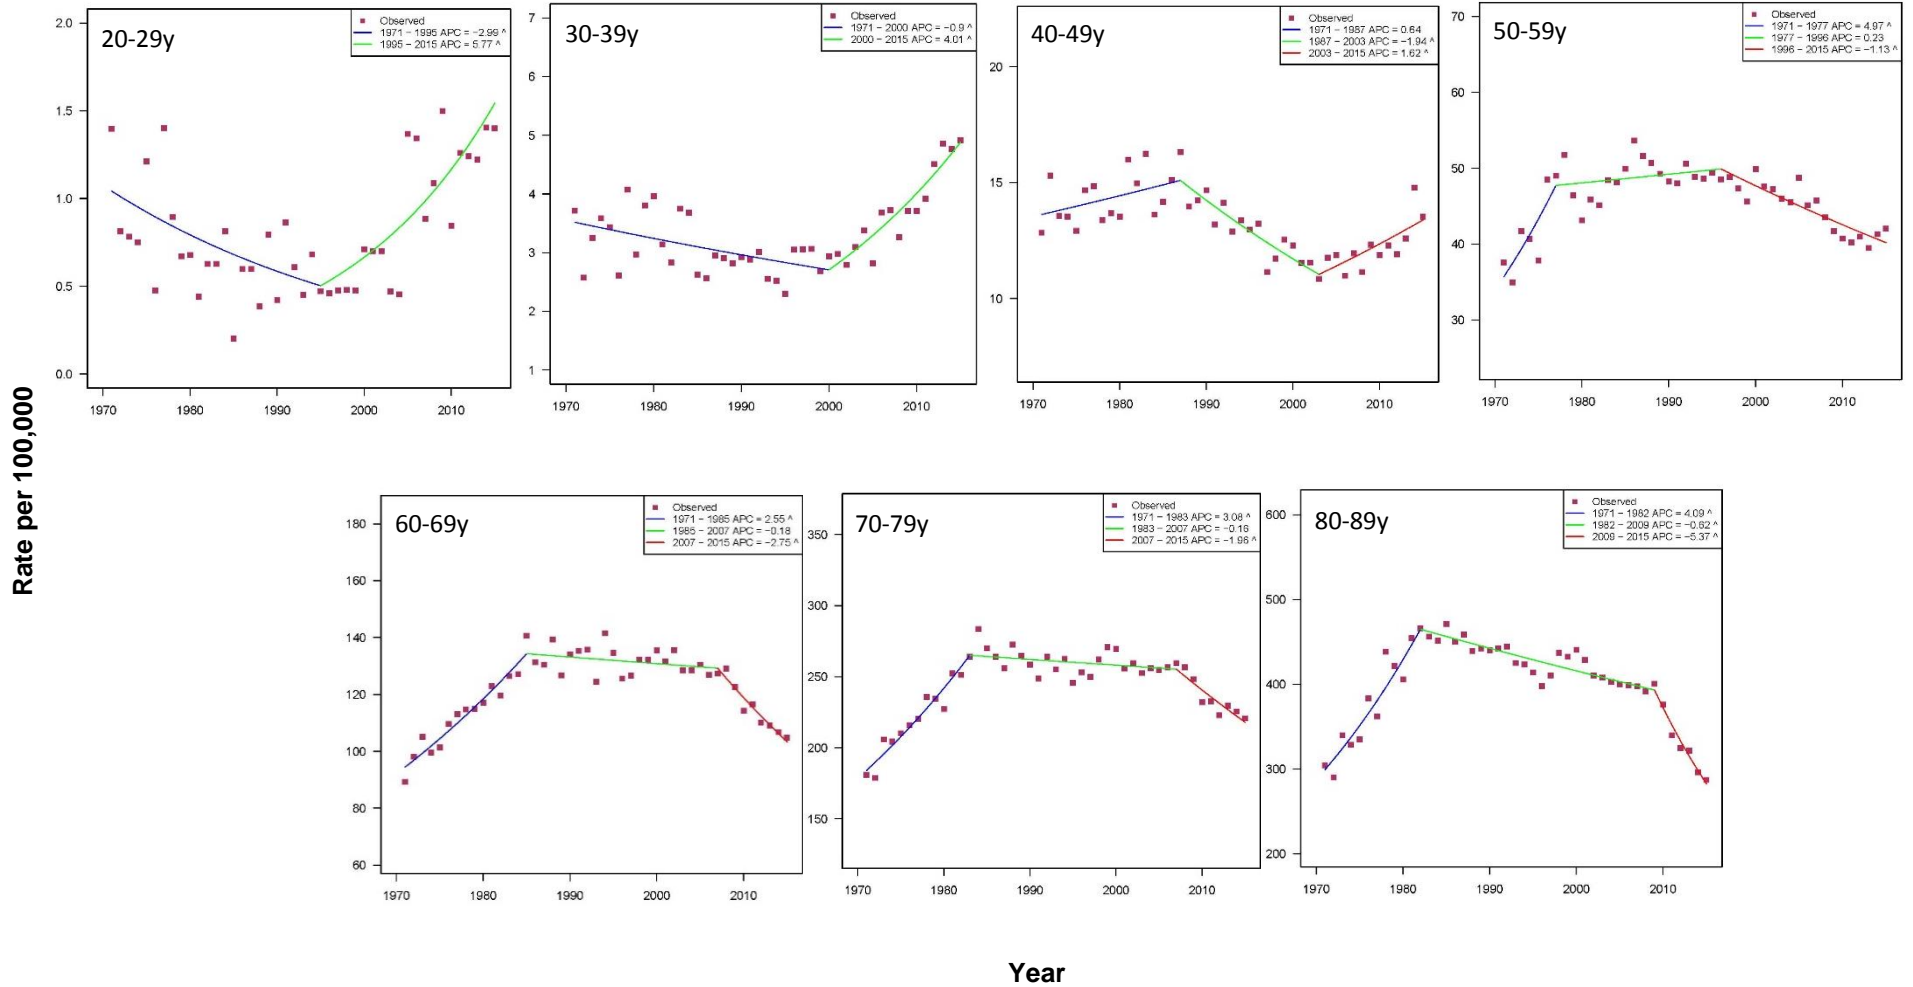

**eFigure 2. Age-Specific Incidence Rates of Colon Cancer Among Men in Canada (1971-2015) by 10-Year Age Groups**

Annual percent changes given in legend.

^ Indicates that the annual percent change is significantly different from zero at the alpha=0.05

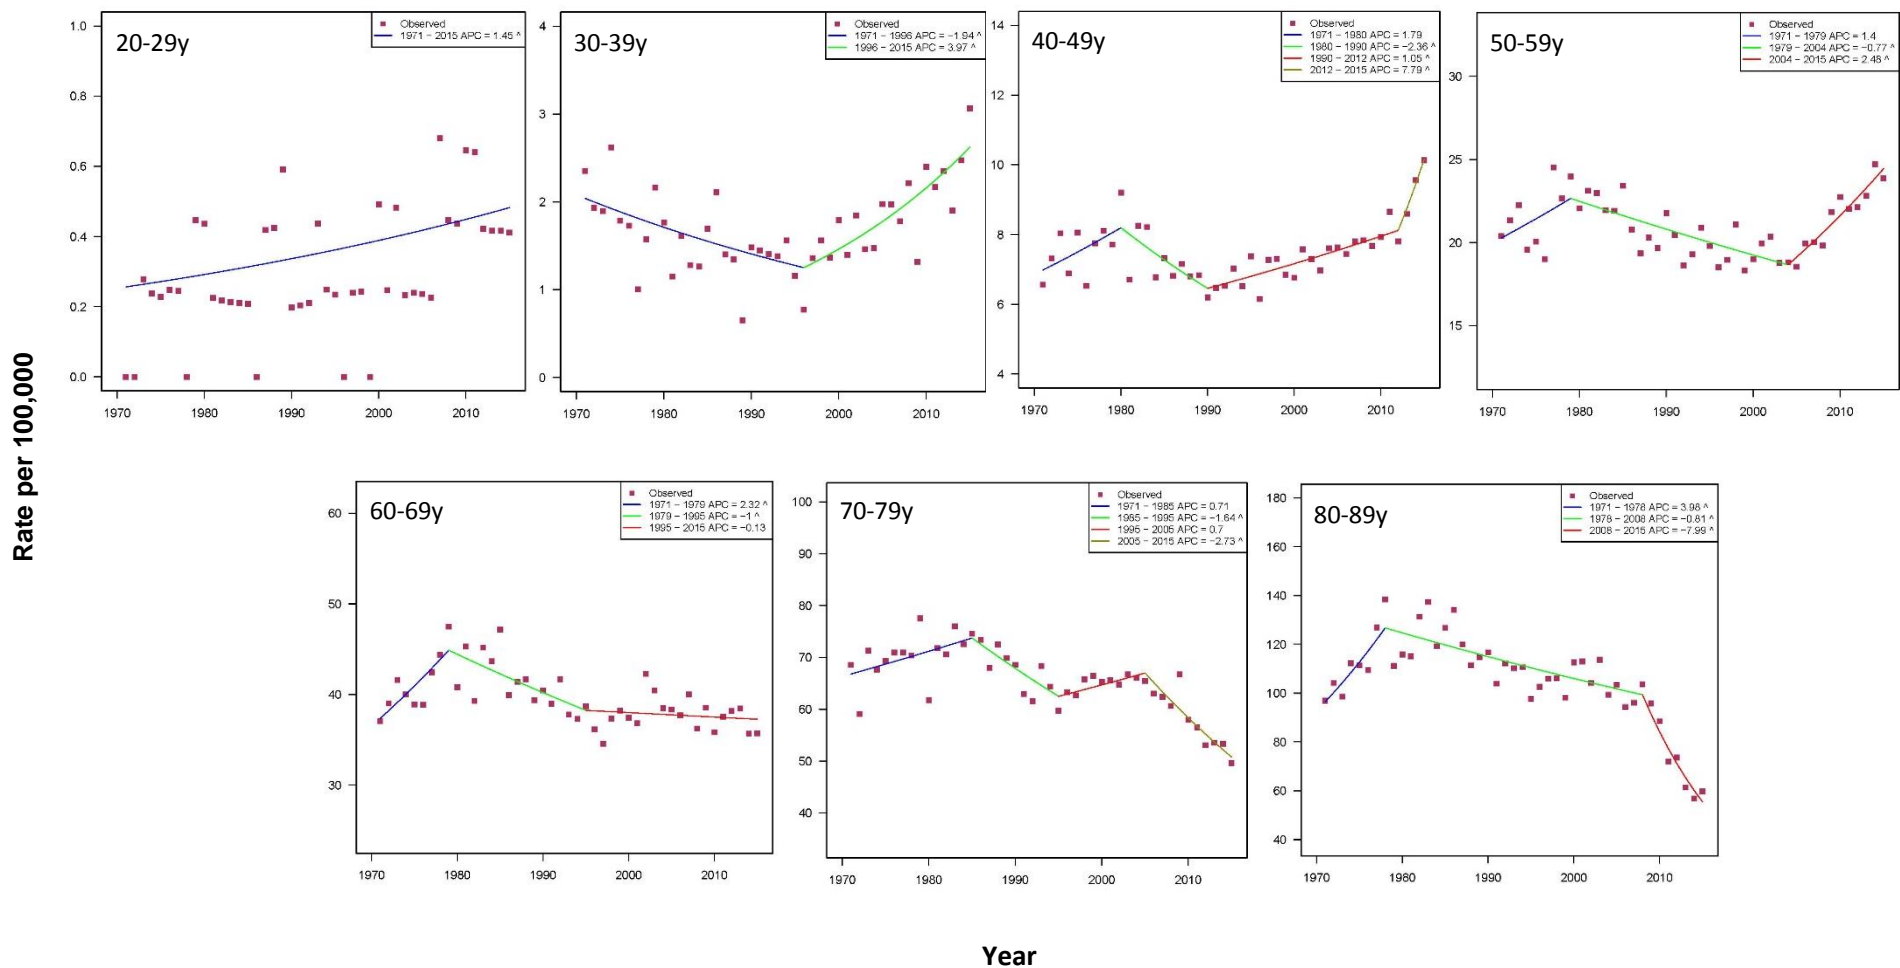

**eFigure 3. Age-Specific Incidence Rates of Rectal Cancer Among Women in Canada (1971-2015) by 10-Year Age Groups**

Annual percent changes given in legend.

^ Indicates that the annual percent change is significantly different from zero at the  $\alpha=0.05$

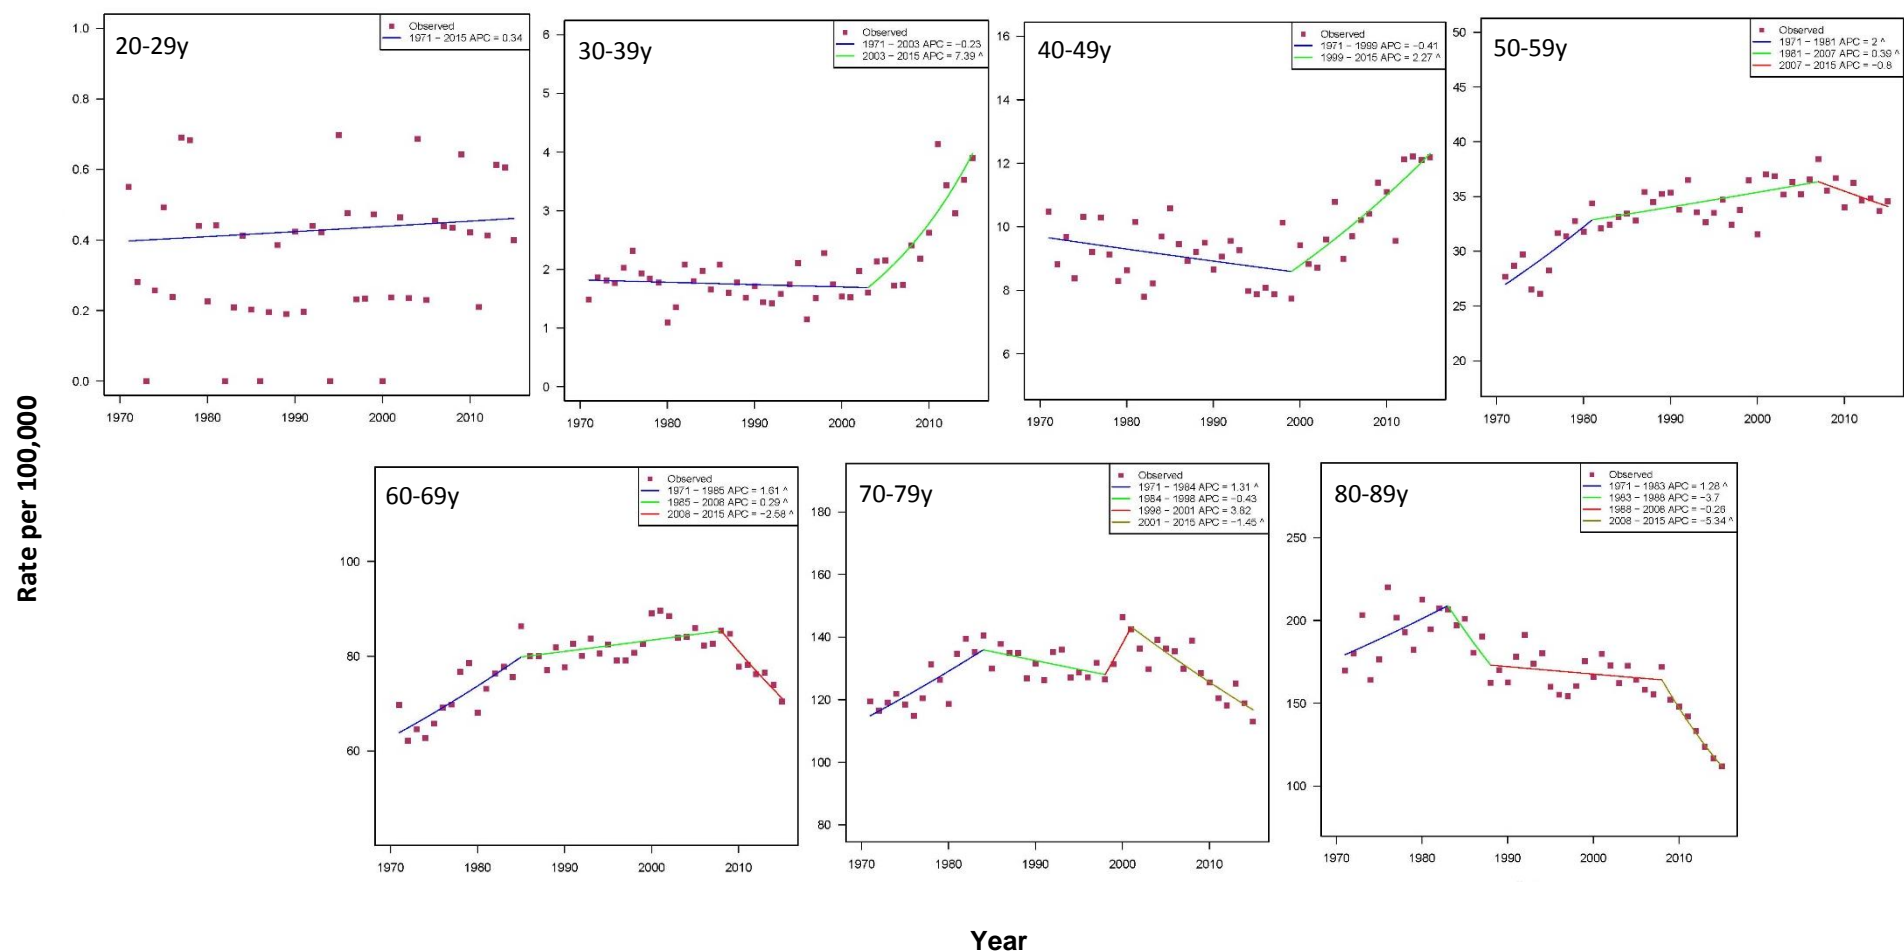

**eFigure 4. Age-Specific Incidence Rates of Rectal Cancer Among Men in Canada (1971-2015) by 10-Year Age Groups**

Annual percent changes given in legend.

^ Indicates that the annual percent change is significantly different from zero at the alpha=0.05 level.
